# Supplementary material for: Formation of a bi-rhodium boron tube Rh2B18 and its great CO2 capture ability
Source: Royal Society of Chemistry journal article supplement (doi:10.1039/c8cp03584a), 2018-01-01
Supplement: c8cp03584a1.pdf [file c8cp03584a1.pdf]

**Supplementary Information**

**Formation of a Bi-rhodium Boron Tube Rh<sub>2</sub>B<sub>18</sub> and Its  
Great CO<sub>2</sub> Capture Ability**

**Hung Tan Pham<sup>#</sup> and Minh Tho Nguyen<sup>&,#,§,\*</sup>**

*& Computational Chemistry Research Group, Ton Duc Thang University, Ho Chi Minh City,  
Vietnam*

*≠ Faculty of Applied Sciences, Ton Duc Thang University, Ho Chi Minh City, Vietnam*

*# Institute for Computational Science and Technology (ICST), Ho Chi Minh City, Vietnam*

*§ Department of Chemistry, KU Leuven, Celestijnenlaan 200F, B-3001 Leuven, Belgium*

Email: [nguyenminhtho@tdt.edu.vn](mailto:nguyenminhtho@tdt.edu.vn); [minh.nguyen@kuleuven.be](mailto:minh.nguyen@kuleuven.be)

**Table S1a.** Electron density ( $\rho$ ) and Laplacian ( $\nabla^2\rho$ ) calculated for bond critical point (BCP), ring critical point (RCP) containing three centers of Rh<sub>2</sub>B<sub>18</sub> double ring structure.

| RCP          | $\rho$ | $\nabla^2\rho$ | BCP       | $\rho$ | $\nabla^2\rho$ |
|--------------|--------|----------------|-----------|--------|----------------|
|              |        |                | Rh19 Rh20 | 0.071  | 0.10           |
| B1 B2 Rh19   | 0.063  | 0.082          | Rh19 B5   | 0.063  | 0.077          |
| B2 B3 Rh19   |        |                | Rh19 B4   |        |                |
| B3 B4 Rh19   |        |                | Rh19 B2   |        |                |
| B4 B17 Rh19  |        |                | Rh19 B2   |        |                |
| B7 B8 Rh19   |        |                | Rh19 B17  |        |                |
| B5 B17 Rh19  |        |                | Rh19 B3   |        |                |
| B5 B6 Rh19   |        |                | Rh19 B8   |        |                |
| B1 B8 Rh19   |        |                | Rh19 B6   |        |                |
| B6 B7 Rh19   |        |                | Rh19 B1   |        |                |
| B9 B10 Rh20  |        |                | Rh19 B7   |        |                |
| B10 B11 Rh20 |        |                | Rh20 B18  |        |                |
| B11 B18 Rh20 |        |                | Rh20 B15  |        |                |
| B12 B18 Rh20 |        |                | Rh20 B9   |        |                |
| B12 B13 Rh20 |        |                | Rh20 B14  |        |                |
| B15 B16 Rh20 |        |                | Rh20 B16  |        |                |
| B13 B14 Rh20 |        |                | Rh20 B13  |        |                |
| B9 B16 Rh20  |        |                | Rh20 B10  |        |                |
| B14 B15 Rh20 |        |                | Rh20 B10  |        |                |
|              |        |                |           |        |                |
|              |        | Rh20 B11       |           |        |                |

**Table S1a.** Electron density ( $\rho$ ) and Laplacian ( $\nabla^2\rho$ ) calculated for ring critical point (RCP) containing five centers and cage critical point (CRP) of Rh<sub>2</sub>B<sub>18</sub> double ring structure.

| RCP                  | $\rho$  | $\nabla^2\rho$ |
|----------------------|---------|----------------|
| B1 B9 B16 Rh20 Rh19  | 0.03    | 0.086          |
| B3 B10 B11 Rh20 Rh19 |         |                |
| B3 B4 B11 Rh20 Rh19  |         |                |
| B5 B12 B17 Rh19 Rh20 |         |                |
| B6 B7 B14 Rh20 Rh19  |         |                |
| B7 B14 B15 Rh20 Rh19 |         |                |
| CCP                  | Density | Laplacian      |
| B3 B11 Rh20 Rh19     | 0.030   | 0.086          |
| B7 B14 Rh20 Rh19     |         |                |

**Table 2.** Cartesian Coordinates of Rh<sub>2</sub>B<sub>18</sub> and Rh<sub>2</sub>B<sub>18</sub>-(CO<sub>2</sub>)<sub>x</sub> with x = 1,2 and 3 (angstrom).

| Structures                                                                                                                         | Cartersian Coordinate |             |             |             |
|------------------------------------------------------------------------------------------------------------------------------------|-----------------------|-------------|-------------|-------------|
| 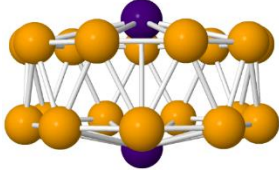 <p style="text-align: center;"><b>18.A</b></p>   | B                     | 0.00000000  | 2.32570515  | 0.78392657  |
|                                                                                                                                    | B                     | -1.49493445 | 1.78159350  | 0.78392657  |
|                                                                                                                                    | B                     | -2.29037246 | 0.40385446  | 0.78392657  |
|                                                                                                                                    | B                     | -2.01411974 | -1.16285257 | 0.78392657  |
|                                                                                                                                    | B                     | 0.79543801  | -2.18544796 | 0.78392657  |
|                                                                                                                                    | B                     | 2.01411974  | -1.16285257 | 0.78392657  |
|                                                                                                                                    | B                     | 2.29037246  | 0.40385446  | 0.78392657  |
|                                                                                                                                    | B                     | 1.49493445  | 1.78159350  | 0.78392657  |
|                                                                                                                                    | B                     | -0.79543801 | 2.18544796  | -0.78392657 |
|                                                                                                                                    | B                     | -2.01411974 | 1.16285257  | -0.78392657 |
|                                                                                                                                    | B                     | -2.29037246 | -0.40385446 | -0.78392657 |
|                                                                                                                                    | B                     | -0.00000000 | -2.32570515 | -0.78392657 |
|                                                                                                                                    | B                     | 1.49493445  | -1.78159350 | -0.78392657 |
|                                                                                                                                    | B                     | 2.29037246  | -0.40385446 | -0.78392657 |
|                                                                                                                                    | B                     | 2.01411974  | 1.16285257  | -0.78392657 |
|                                                                                                                                    | B                     | 0.79543801  | 2.18544796  | -0.78392657 |
|                                                                                                                                    | B                     | -0.79543801 | -2.18544796 | 0.78392657  |
|                                                                                                                                    | B                     | -1.49493445 | -1.78159350 | -0.78392657 |
| Rh                                                                                                                                 | -0.00000000           | -0.00000000 | 1.27408400  |             |
| Rh                                                                                                                                 | -0.00000000           | -0.00000000 | -1.27408400 |             |
|  <p style="text-align: center;"><b>1C.A</b></p> | B                     | 2.83797800  | -1.02583800 | 0.12430700  |
|                                                                                                                                    | B                     | 2.97454800  | 0.57487800  | 0.09493500  |
|                                                                                                                                    | B                     | 2.01934500  | 1.80343900  | 0.43424100  |
|                                                                                                                                    | B                     | 0.54307700  | 2.28449900  | 0.87705700  |
|                                                                                                                                    | B                     | -1.45077200 | 0.21419800  | 1.44589000  |
|                                                                                                                                    | B                     | -1.07480000 | -1.38391200 | 1.49018400  |
|                                                                                                                                    | B                     | 0.17472300  | -2.21931300 | 1.02891000  |
|                                                                                                                                    | B                     | 1.69103900  | -2.05254100 | 0.52833000  |
|                                                                                                                                    | B                     | 2.45043100  | -0.22327500 | -1.38577000 |
|                                                                                                                                    | B                     | 2.11911800  | 1.32529400  | -1.26525600 |
|                                                                                                                                    | B                     | 0.84303500  | 2.17631900  | -0.87584700 |
|                                                                                                                                    | B                     | -2.00455000 | 1.12188100  | 0.01075900  |
|                                                                                                                                    | B                     | -2.19494500 | -0.75402400 | 0.24586300  |
|                                                                                                                                    | B                     | -0.98917000 | -1.77052100 | -0.21129000 |
|                                                                                                                                    | B                     | 0.43328200  | -2.25860000 | -0.74443500 |
|                                                                                                                                    | B                     | 1.84292900  | -1.67996100 | -1.18509900 |
|                                                                                                                                    | B                     | -0.82602900 | 1.69918400  | 1.38885500  |
|                                                                                                                                    | B                     | -0.64873500 | 1.95691600  | -0.36012200 |
|                                                                                                                                    | C                     | -3.66585200 | -0.25108900 | -0.17957000 |
|                                                                                                                                    | O                     | -4.74661600 | -0.71305400 | -0.37510900 |
| O                                                                                                                                  | -3.36522500           | 1.11968200  | -0.37874500 |             |
| Rh                                                                                                                                 | 0.22779400            | -0.02312200 | -1.25814200 |             |
| Rh                                                                                                                                 | 0.73192400            | 0.00779700  | 1.23371200  |             |
|  <p style="text-align: center;"><b>2C.A</b></p> | B                     | -3.17377000 | -1.06050500 | -0.22033000 |
|                                                                                                                                    | B                     | -1.89814800 | -2.00765400 | -0.46894900 |
|                                                                                                                                    | B                     | -0.29970600 | -2.03615300 | -0.36482200 |
|                                                                                                                                    | B                     | 1.38760000  | -2.02801000 | -0.37867800 |
|                                                                                                                                    | B                     | 0.75690400  | 0.68016000  | 1.09288800  |
|                                                                                                                                    | B                     | -0.62766700 | 1.51079100  | 1.48187400  |
|                                                                                                                                    | B                     | -2.18001200 | 1.42918600  | 1.17910500  |
|                                                                                                                                    | B                     | -3.15064000 | 0.37240700  | 0.49298800  |
|                                                                                                                                    | B                     | -2.46775200 | -0.91189700 | -1.78562000 |

|  |    |             |             |             |
|--|----|-------------|-------------|-------------|
|  | B  | -0.95992900 | -1.43509700 | -1.92616400 |
|  | B  | 0.60457000  | -1.35883400 | -1.73059200 |
|  | B  | 3.17482200  | 0.34540700  | -1.16077100 |
|  | B  | 0.44674000  | 2.20190000  | 0.29274800  |
|  | B  | -1.18717700 | 2.28314400  | -0.02682100 |
|  | B  | -2.54235100 | 1.65307800  | -0.58872900 |
|  | B  | -3.26995500 | 0.34779000  | -1.23280500 |
|  | B  | 2.02595200  | 0.02125100  | 1.88631900  |
|  | B  | 1.79194500  | -0.48638200 | -0.87097700 |
|  | C  | 1.52659900  | 3.21690100  | 0.24756700  |
|  | C  | 2.40635700  | -3.04782500 | -0.05670100 |
|  | O  | 2.40820200  | 3.93704100  | 0.18083800  |
|  | O  | 4.15300800  | 1.02908600  | -1.38210400 |
|  | O  | 2.92181000  | -0.47910000 | 2.53824500  |
|  | O  | 3.24271000  | -3.74494400 | 0.28744100  |
|  | Rh | -0.17335000 | 0.49096200  | -0.92270300 |
|  | Rh | -1.32799900 | -0.59216300 | 1.08950600  |
|  | B  | 2.08863500  | -2.11375300 | 1.04399600  |
|  | B  | 2.10290400  | -0.71174500 | 1.81193100  |
|  | B  | 1.50772000  | 0.52763900  | 1.07471100  |
|  | B  | -0.29232300 | 1.12776300  | 1.20463500  |
|  | B  | -1.75048000 | 0.24609000  | 0.50541600  |
|  | B  | -2.00210600 | -2.33421100 | -0.01061100 |
|  | B  | -0.60005700 | -3.04165900 | -0.12453900 |
|  | B  | 1.00395400  | -3.01691400 | 0.23884700  |
|  | B  | 2.74534900  | -0.60668300 | 0.08853000  |
|  | B  | 4.25354400  | -0.02944700 | -0.25634800 |
|  | B  | 0.87597300  | 1.67990000  | 0.02399200  |
|  | B  | -1.56774900 | 2.29205400  | -1.56682300 |
|  | B  | -2.49377300 | -0.92482500 | -0.62189500 |
|  | B  | -0.92494500 | -1.45068600 | -1.09080300 |
|  | B  | 0.49424700  | -2.26264300 | -1.22614700 |
|  | B  | 1.92900300  | -1.82860500 | -0.67236300 |
|  | B  | -0.61149400 | 1.88022300  | 2.64530200  |
|  | B  | -0.74534500 | 1.38800000  | -0.47850300 |
|  | C  | -3.63343900 | -0.58112200 | -1.52060000 |
|  | C  | 1.59742300  | 2.94510000  | -0.26269200 |
|  | C  | -2.85676200 | 0.44119700  | 1.49932700  |
|  | O  | -4.53359100 | -0.29608200 | -2.15598500 |
|  | O  | -2.21998400 | 2.86962500  | -2.41294700 |
|  | O  | 5.33477200  | 0.44700500  | -0.53165200 |
|  | O  | 2.18905400  | 3.88221000  | -0.52841900 |
|  | O  | -0.88169500 | 2.42189800  | 3.69439200  |
|  | O  | -3.76094500 | 0.50714900  | 2.19510300  |
|  | Rh | 0.70086800  | -0.05248500 | -1.24938700 |
|  | Rh | -0.02819100 | -1.04947000 | 0.95323700  |

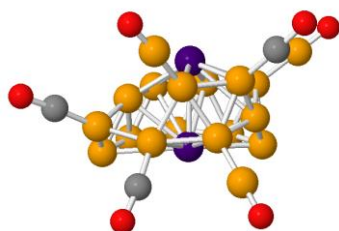

3C.A

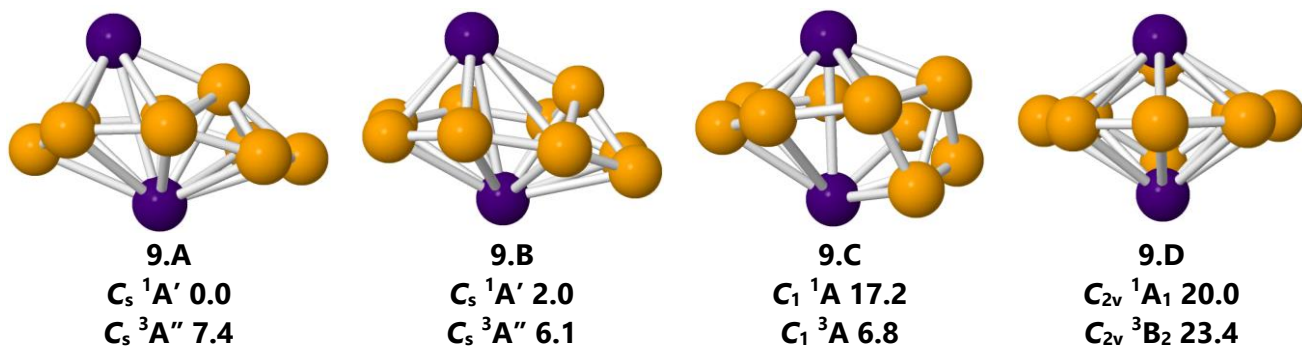

**Figure S1.** The lower-lying isomers of  $Rh_2B_9^-$  clusters. Geometry optimization and energy calculations were performed by using the TPSSh functional combining with 6-311+g(d) basis set for B and aug-cc-pVTZ-PP for Rh.

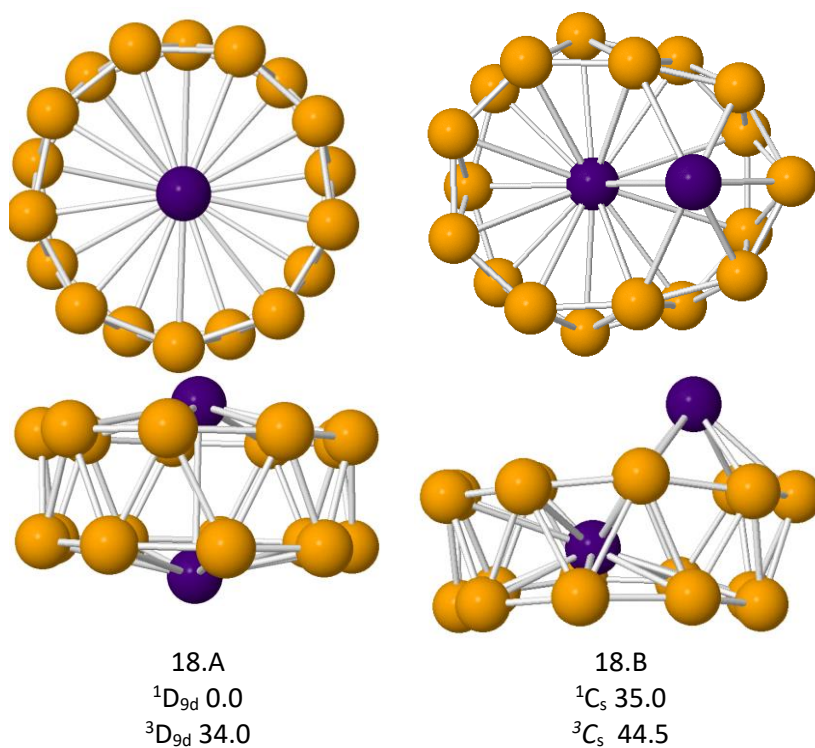

**Figure S2.** The shape and relative energy (kcal/mol) of lower-lying isomers of  $Rh_2B_{18}$  cluster. Geometry optimization and energy calculations were performed by using the TPSSh functional combining with 6-311+g(d) basis set for B, C, O and aug-cc-pVTZ-PP for Rh.

**B<sub>18</sub>****Rh<sub>2</sub>B<sub>18</sub>****Rh<sub>2</sub>**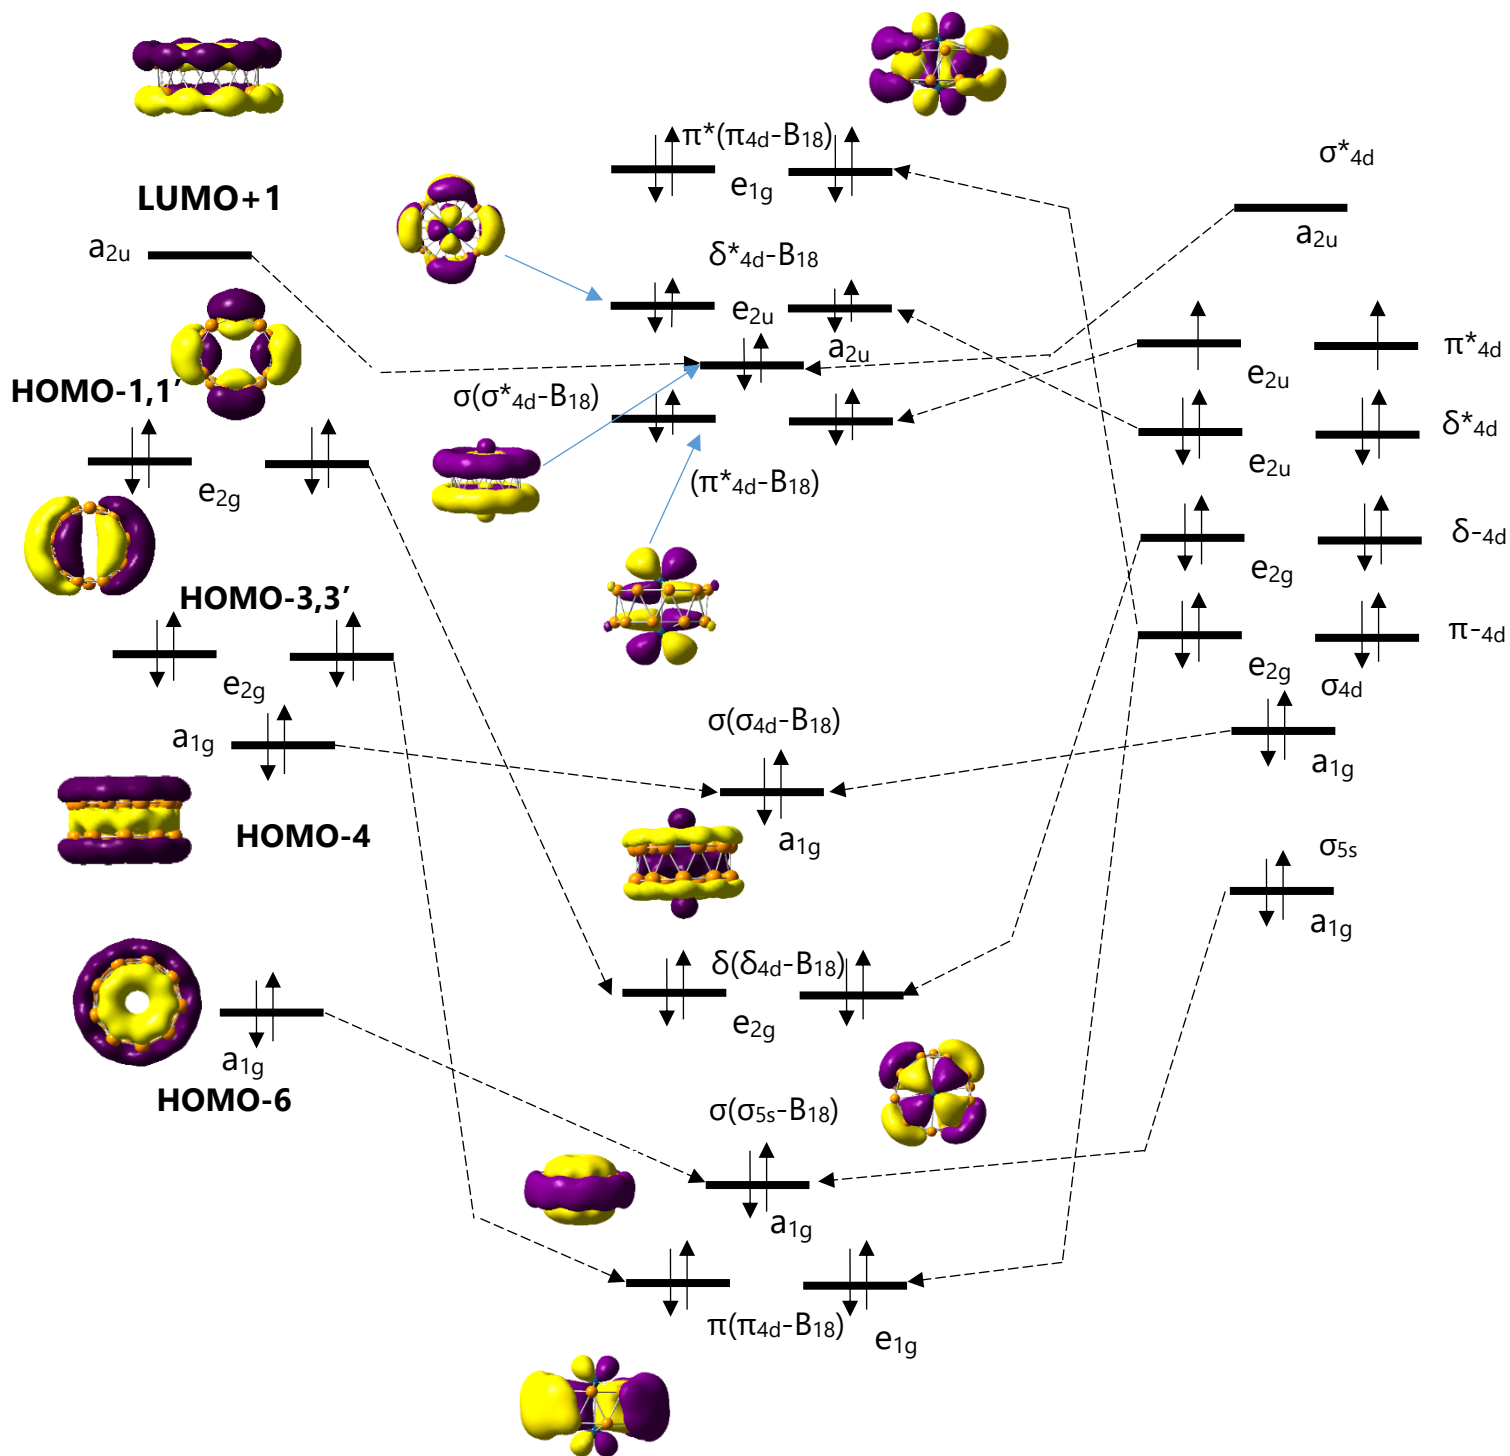

**Figure S3.** The qualitative presence of orbital interaction between B<sub>18</sub> tube and Rh<sub>2</sub> resulting Rh<sub>2</sub>B<sub>18</sub> cluster.

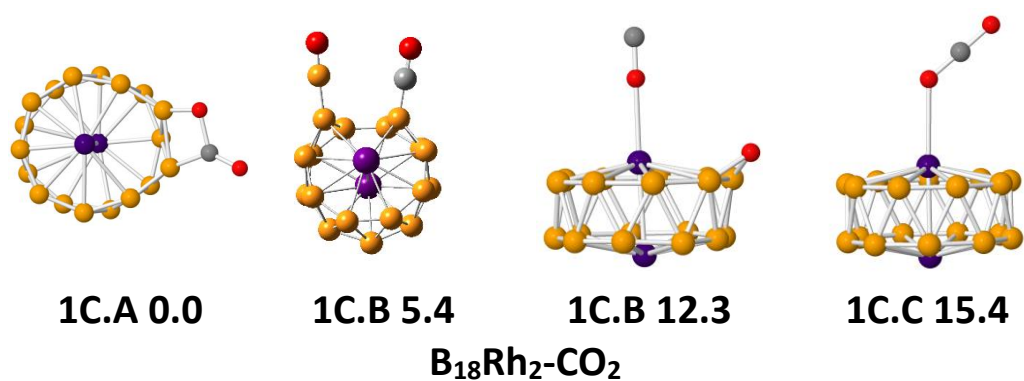

**Figure S4.** The shape and relative energy of configuration of Rh<sub>2</sub>B<sub>18</sub>-CO<sub>2</sub>. Geometry optimization and energy calculations were performed by using the TPSSh functional combining with 6-311+g(d) basis set for B, C, O and aug-cc-pVTZ-PP for Rh.

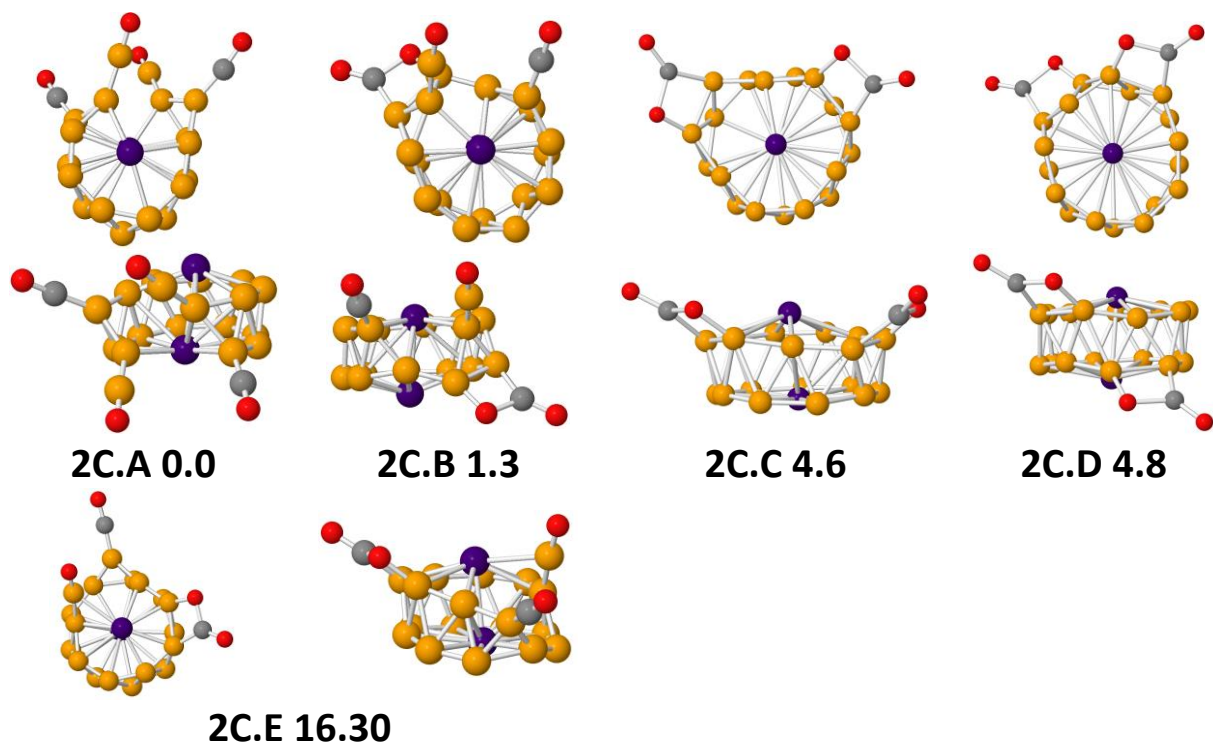

**Figure S5.** The shape and relative energy of configuration of  $\text{Rh}_2\text{B}_{18}(\text{CO}_2)_2$ . Geometry optimization and energy calculations were performed by using the TPSSh functional combining with 6-311+g(d) basis set for B, C, O and aug-cc-pVTZ-PP for Rh.

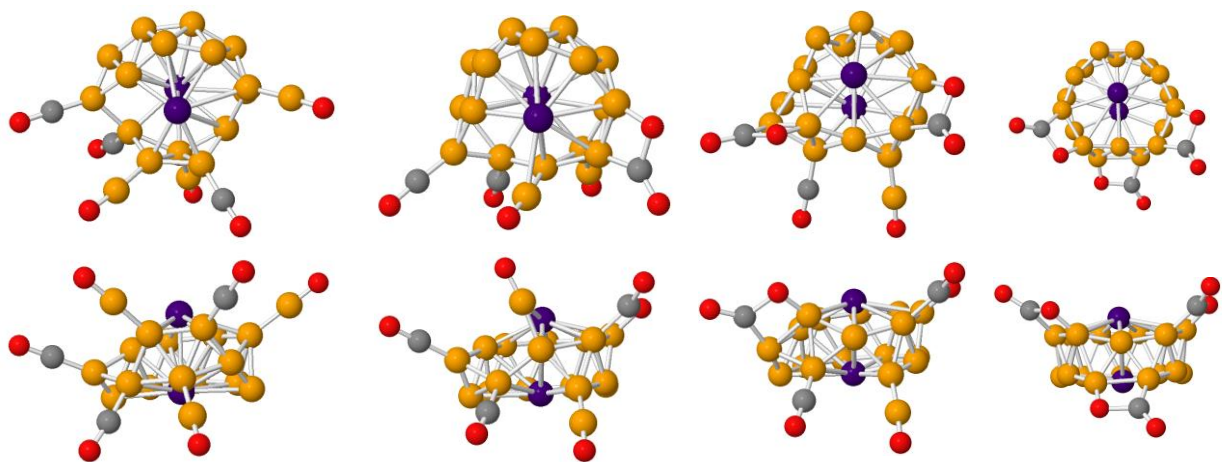



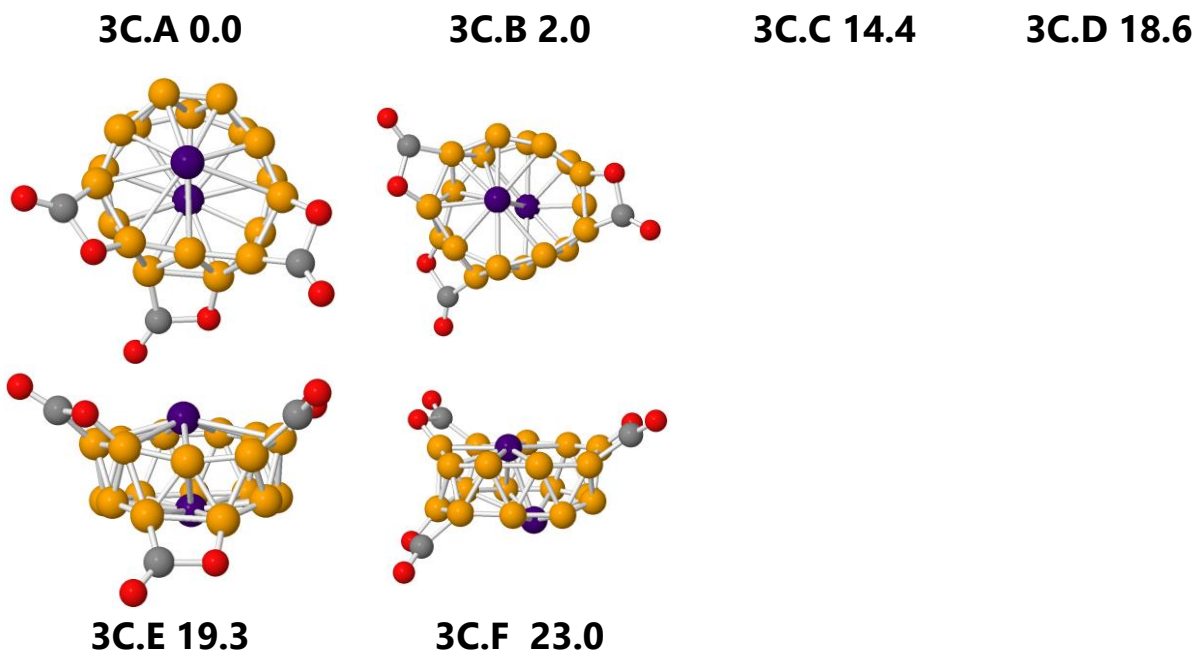

**Figure S6.** The shape and relative energy of configuration of  $\text{Rh}_2\text{B}_{18}-(\text{CO}_2)_3$ . Geometry optimization and energy calculations were performed by using the TPSSh functional combining with 6-311+g(d) basis set for B, C, O and aug-cc-pVTZ-PP for Rh.

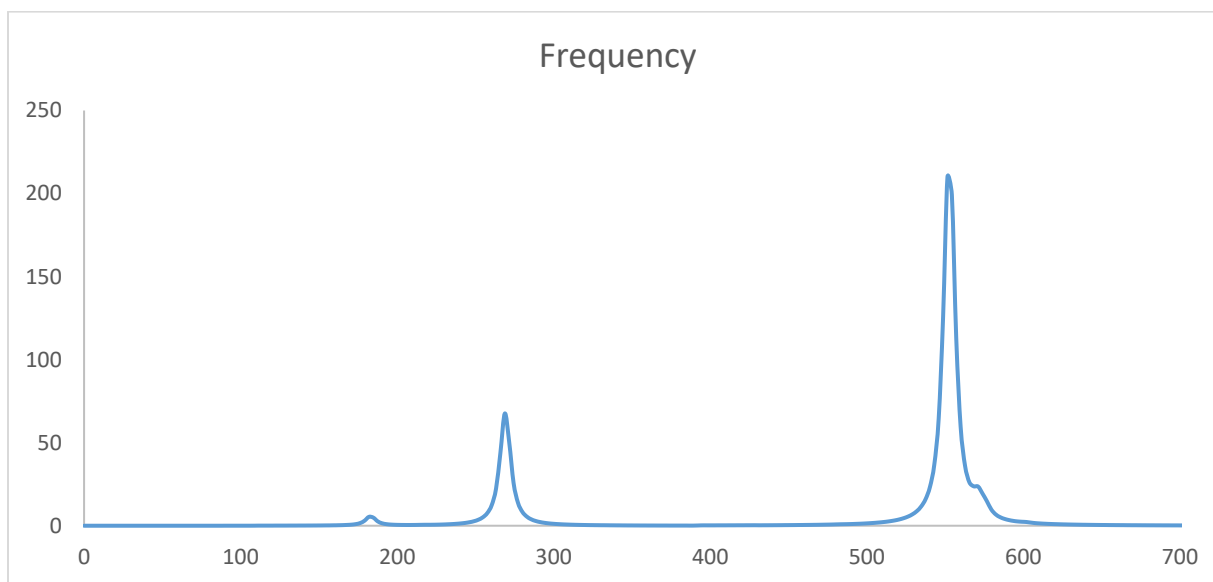

**Figure S7.** The IR spectrum of 18.A. The frequency calculations were performed by using the TPSSh functional combining with 6-311+g(d) basis set for B, C, O and aug-cc-pVTZ-PP for Rh.

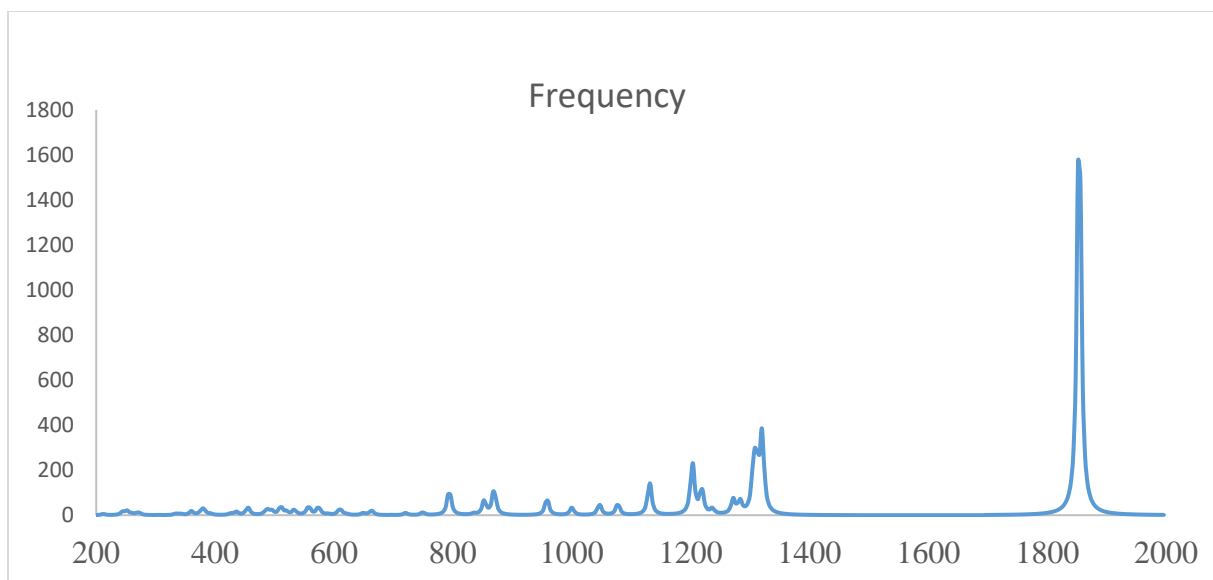

**Figure S8.** The IR spectrum of 1C.A. The frequency calculations were performed by using the TPSSh functional combining with 6-311+g(d) basis set for B, C, O and aug-cc-pVTZ-PP for Rh.

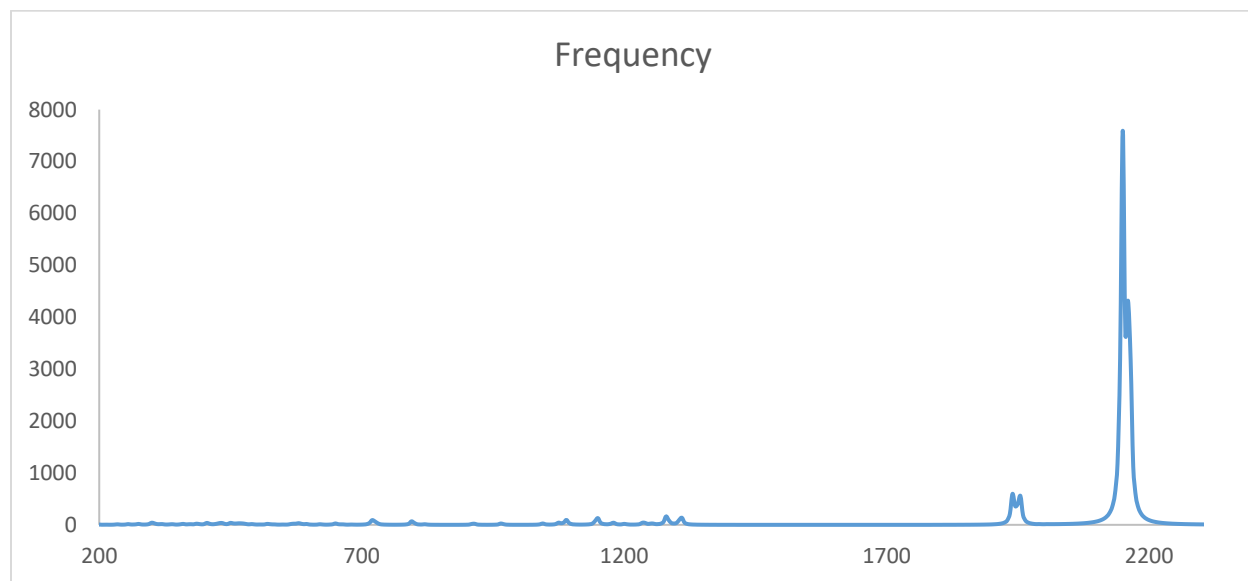

**Figure S9.** The IR spectrum of 2C.A. The frequency calculations were performed by using the TPSSh functional combining with 6-311+g(d) basis set for B, C, O and aug-cc-pVTZ-PP for Rh.

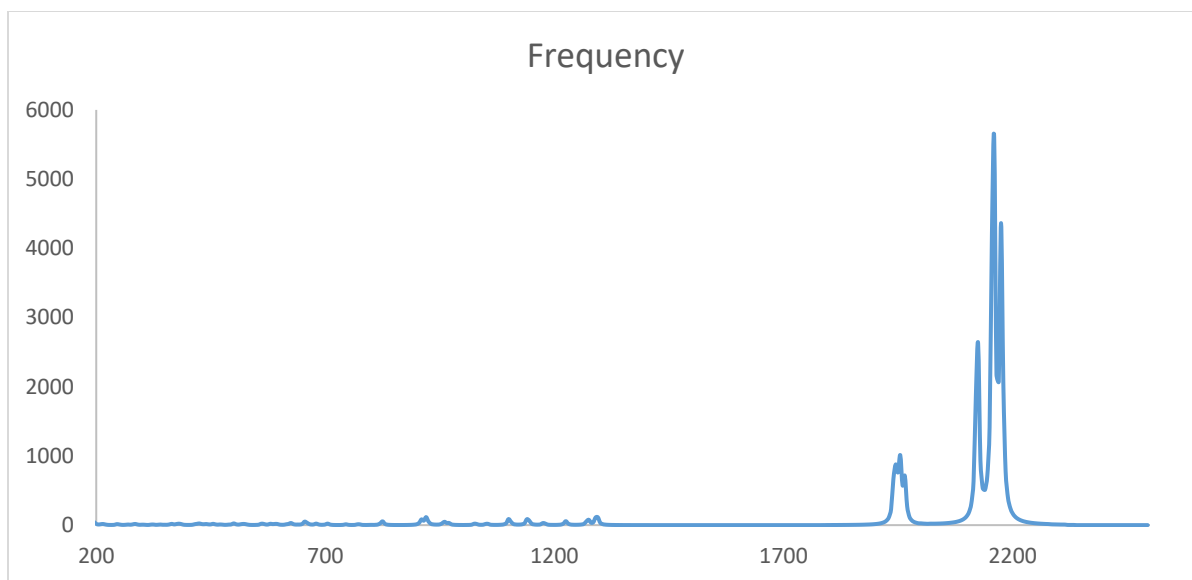

**Figure S10.** The IR spectrum of 3C.A. The frequency calculations were performed by using the TPSSh functional combining with 6-311+g(d) basis set for B, C, O and aug-cc-pVTZ-PP for Rh.

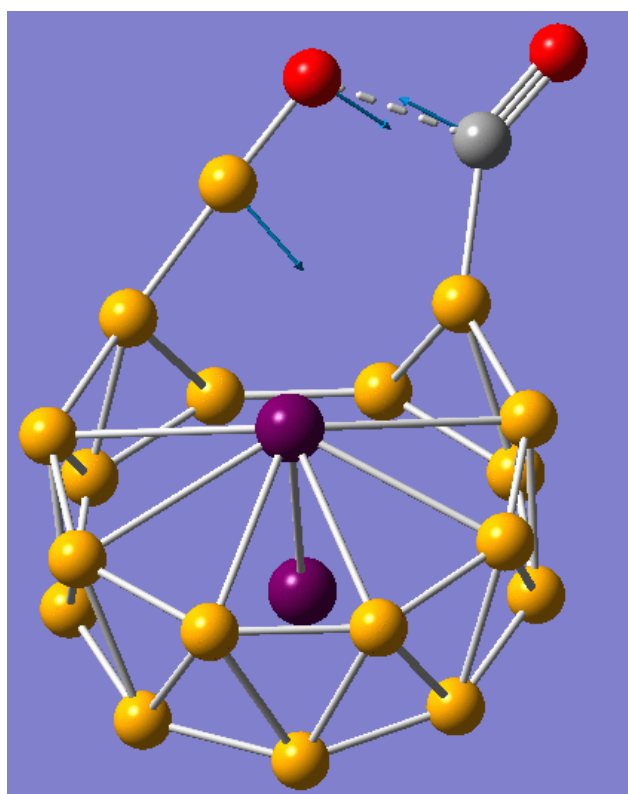

**Figure S11.** Reaction mode of transition structure 1C.TS

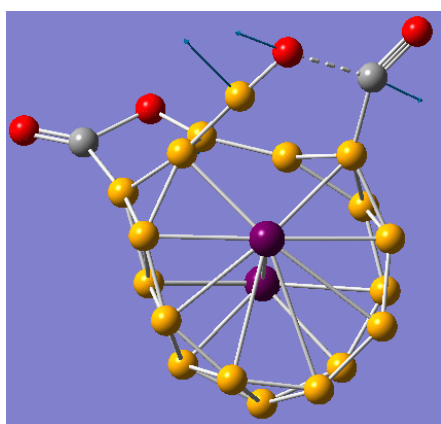

**2C.D.TS1**

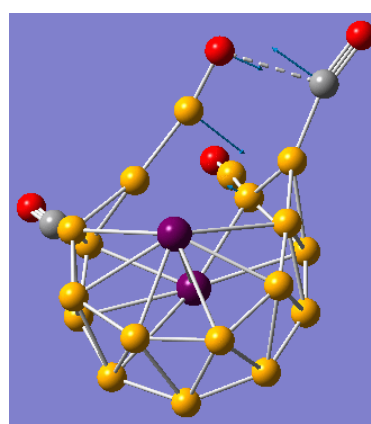

**2C.D.TS2**

a)

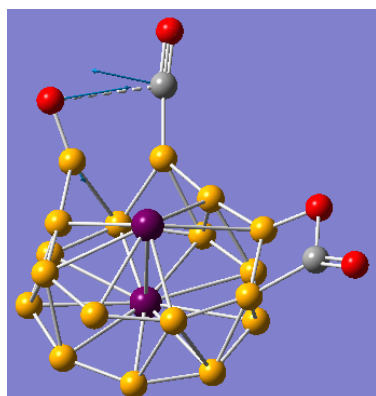

**2C.C.TS1**

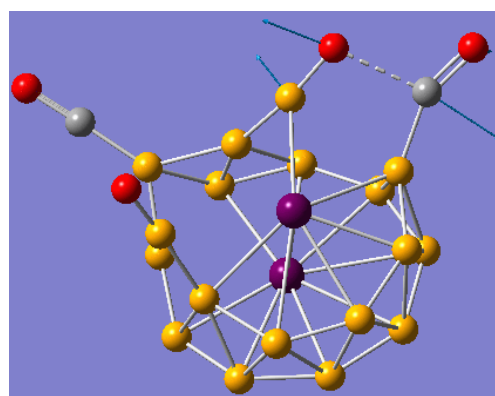

**2C.C.TS2**

b)

**Figure S12.** Reaction mode of a) **2C.D.TS1**, **2C.D.TS2** and b) **2C.C.TS1** and **2C.C.TS2**.

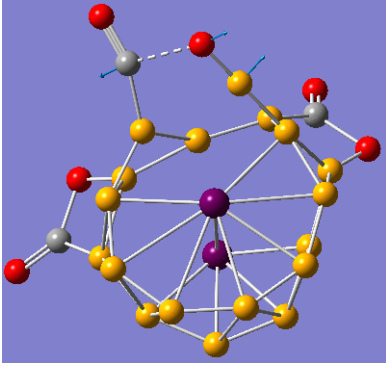

**3C.TS1**

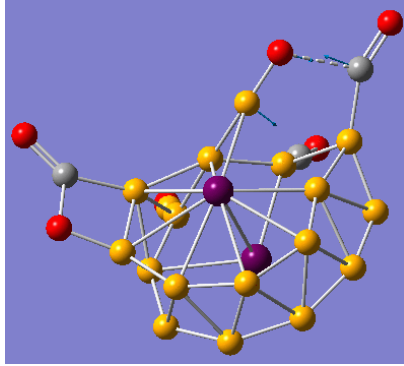

**3C.TS2**

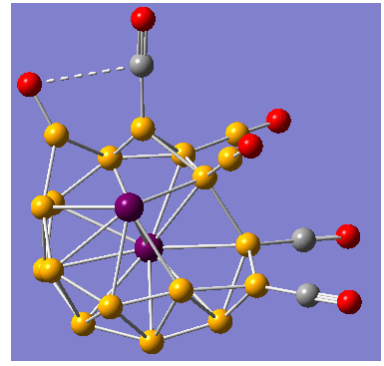

**3C.TS3**

**Figure S13.** Reaction mode of **3C.TS1**, **3C.TS2** and **3C.TS3**

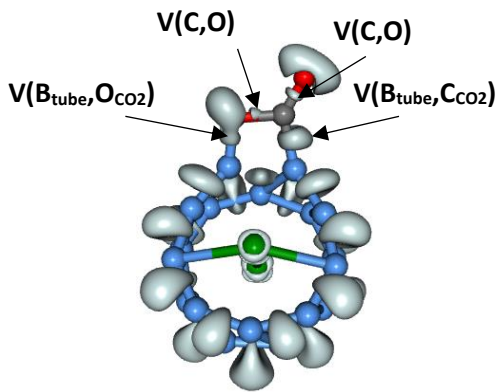

**1A.A**

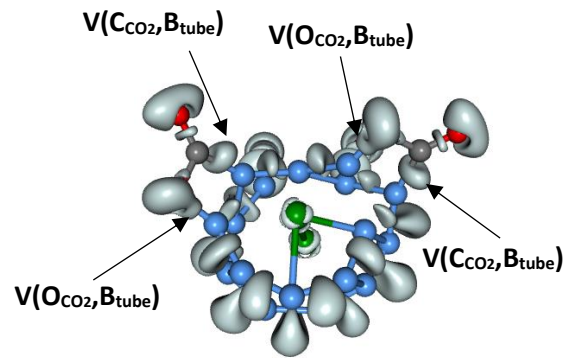

**3C.D**

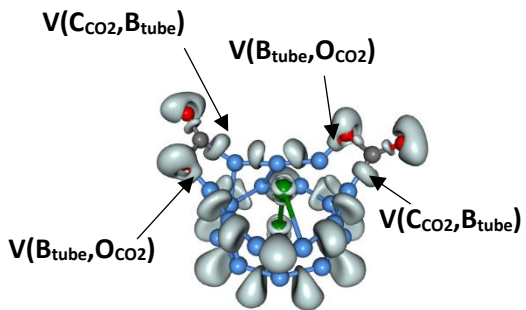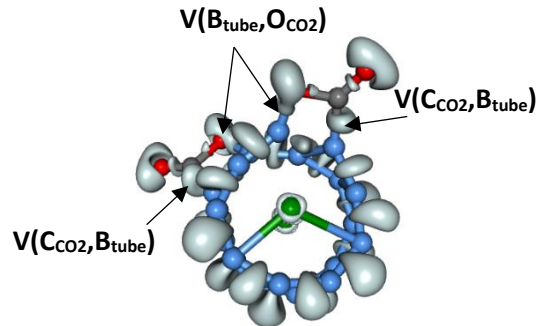

2C.C

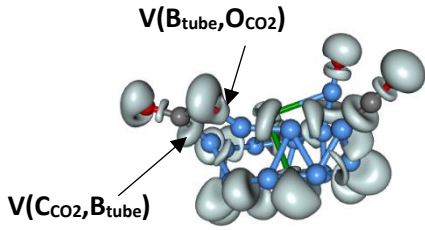

2C.D

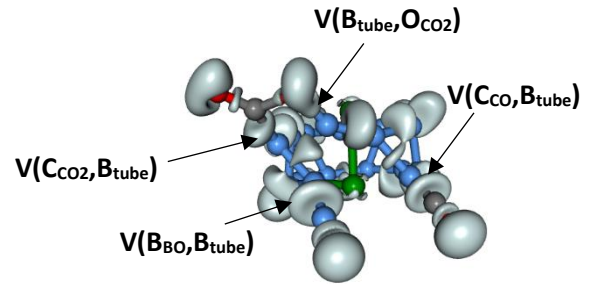

2C.E

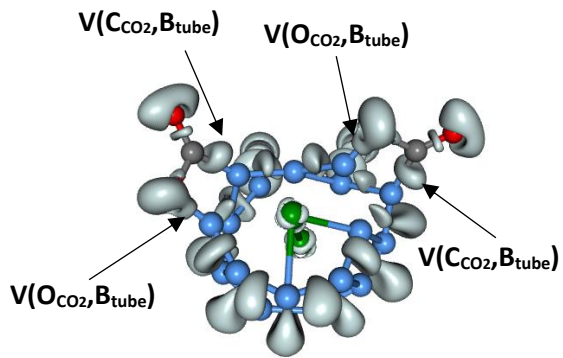

2C.B

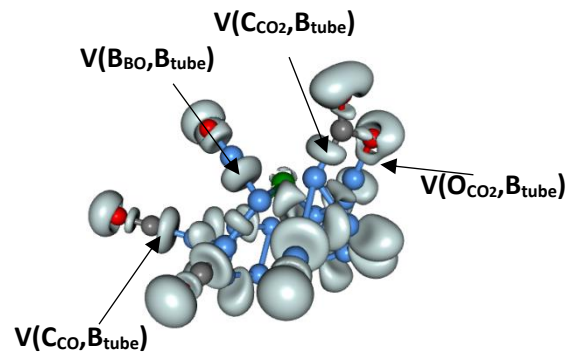

3C.D

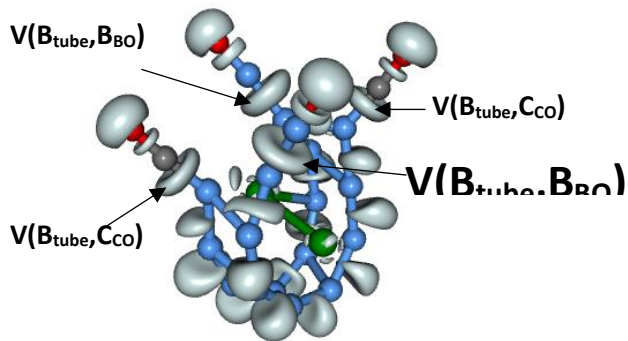

3C.B

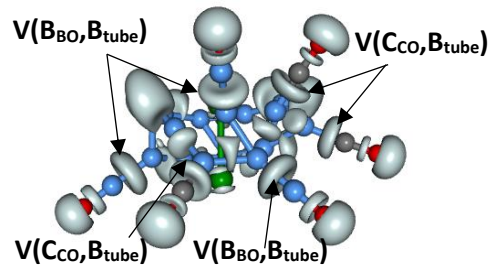

2C.A

3C.A

**Figure S14.** The ELI\_D surface maps plotted at the bifurcation value of 1.45 for **1C.A, 2C.A, 2C.C, 2C.D, 2C.E, 3C.A, 3C.B, 3C.A.**
